# Supplementary material for: Expression of VEGF and Semaphorin Genes Define Subgroups of Triple Negative Breast Cancer
Source: PubMed Central journal article supplement (PMC3648524; doi:10.1371/journal.pone.0061788), 2013-05-08
Supplement: pone.0061788.s001.pdf [file pone.0061788.s001.pdf]

**Supplemental material for:**

**Expression of VEGF and Semaphorin genes  
define subgroups of triple negative breast cancer**

R. Joseph Bender and Feilim Mac Gabhann

Institute for Computational Medicine and Department of Biomedical Engineering,  
Johns Hopkins University, Baltimore MD 21218

**Table S1. Gene expression datasets used in this study**

**Table S2: Ligand genes included in this study**

**Table S3: Receptor genes included in this study**

**Table S4: Means and standard deviations of gene expression**

**Table S5: Clinical trial results for bevacizumab by hormone receptor status**

**Table S6: Genes associated with VEGF- and semaphorin-based principal component PC3a**

**Table S7: Genes associated with VEGF- and semaphorin-based principal component PC4a**

**Figure S1: Relationship between PCA scores and triple negative status for tumor data set**

**Figure S2: Association of PCA scores with PAM50 subtypes**

**Figure S3: Heatmap of clusters based only on PC3a and PC4a**

**Figure S4: Relationship between PCA of all tumors and PCA of TNBC samples only**

**Figure S5: Relationship between PCA scores of overlapping samples from two TCGA datasets**

**Figure S6: Correlation of PCA loadings vectors between all tumor dataset and TCGA datasets**

**Figure S7: Gene expression of the MSL subtype**

**Figure S8: Consensus *K*-means clustering of all tumor samples**

**Figure S9: Consensus *K*-means clustering of TNBCs**

**Figure S10: Heatmaps of TCGA data**

**Figure S11: Survival analysis by clusters**

**Figure S12: Survival analysis based on PC4a and ESR1 expression**

**Figure S13: Association between PC4a score in the five PAM50 subtypes**

**Table S1: Gene expression datasets used in this study.** As noted in the main text, samples must be untreated primary tumors. Unless otherwise noted, each sample in the datasets represents one tumor. The numbers of tumor samples are the actual number of samples used in the analysis; replicate samples were removed.

| Dataset  | N   | Reference | Notes                                            |
|----------|-----|-----------|--------------------------------------------------|
| GSE1456  | 159 | 65        |                                                  |
| GSE1561  | 49  | 66        | Core biopsy, >20% tumor cell content             |
| GSE2034  | 286 | 67        | Tumor cell content >70%, all lymph-node negative |
| GSE2603  | 99  | 68        | Tumor cell content >70%                          |
| GSE2990  | 104 | 69        |                                                  |
| GSE3494  | 251 | 70        |                                                  |
| GSE5327  | 58  | 71        | All ER-                                          |
| GSE5847  | 28  | 72        | 47 stroma, 48 tumor (LCM); Surgical samples      |
| GSE7390  | 198 | 73        |                                                  |
| GSE11121 | 200 | 74        | Tumor cell content >40%                          |
| GSE20194 | 42  | 75        | Tumor cell content >70%, 30 replicates           |
| GSE20271 | 116 | 76        |                                                  |
| GSE20437 | 42  | 77        | Normal breast tissue (no tumors)                 |
| GSE21217 | 11  | 78        | Surgical samples                                 |
| GSE22093 | 68  | 79        |                                                  |
| GSE22597 | 74  | 53        |                                                  |
| GSE23988 | 61  | 79        |                                                  |
| GSE24185 | 103 | 80        |                                                  |
| GSE25066 | 508 | 81        |                                                  |
| GSE31519 | 67  | 82        |                                                  |
| GSE32072 | 25  | 83        |                                                  |
| GSE36772 | 100 | N/A       |                                                  |
| GSE36773 | 49  | N/A       |                                                  |

**Table S2: Ligand genes included in this study**

| Gene   | Probe ID                                                 | Full Name                            | Interactions                     | Effects                                                                                      | References           |
|--------|----------------------------------------------------------|--------------------------------------|----------------------------------|----------------------------------------------------------------------------------------------|----------------------|
| VEGFA  | 210512_s_at<br>210513_s_at<br>211527_x_at<br>212171_x_at | Vascular Endothelial Growth Factor A | VEGFR1<br>VEGFR2<br>NRP1<br>NRP2 | Promotes angiogenesis                                                                        | 3                    |
| VEGFB  | 203683_s_at                                              | Vascular Endothelial Growth Factor B | VEGFR1<br>NRP1                   | Promotes angiogenesis, particularly in the heart / coronary artery                           | 3                    |
| VEGFC  | 209946_at                                                | Vascular Endothelial Growth Factor C | VEGFR2<br>VEGFR3<br>NRP1<br>NRP2 | Promotes lymphangiogenesis                                                                   | 3                    |
| PGF    | 209652_s_at<br>215179_x_at                               | Placental Growth Factor              | VEGFR1<br>NRP1                   | Promotes angiogenesis, potentially through VEGFR1-mediated recruitment of inflammatory cells | 3                    |
| SEMA3A | 206805_at                                                | Semaphorin 3A                        | NRP1                             | Inhibits angiogenesis                                                                        | 23<br>30             |
| SEMA3B | 203070_at<br>203071_at                                   | Semaphorin 3B                        | NRP1<br>NRP2                     | Inhibits angiogenesis but is inactivated when cleaved by furin proteases                     | 31                   |
| SEMA3C | 203788_s_at<br>203789_s_at                               | Semaphorin 3C                        | NRP1<br>NRP2                     | Unclear, possibly pro-angiogenic                                                             | 32<br>33             |
| SEMA3D | 215324_at                                                | Semaphorin 3D                        | NRP1<br>NRP2                     | Inhibits angiogenesis                                                                        | 30                   |
| SEMA3E | 206941_x_at                                              | Semaphorin 3E                        | PLXND1                           | Inhibits angiogenesis                                                                        | 30<br>34<br>35       |
| SEMA3F | 206832_s_at<br>209730_at<br>35666_at                     | Semaphorin 3F                        | NRP2                             | Inhibits angiogenesis; may be more potent after cleavage by a furin protease                 | 23<br>30<br>36<br>37 |
| SEMA3G | 219689_at                                                | Semaphorin 3G                        | NRP2                             | Inhibits angiogenesis                                                                        | 30<br>38             |
| SEMA4A | 219259_at                                                | Semaphorin 4A                        | PLXND1                           | Inhibits angiogenesis                                                                        | 28                   |
| SEMA4C | 219039_at<br>46665_at                                    | Semaphorin 4C                        | PLXNB2                           | Unknown                                                                                      | N/A                  |
| SEMA4D | 203528_at                                                | Semaphorin 4D                        | PLXNB1<br>PLXNB2                 | Promotes angiogenesis                                                                        | 29<br>39             |
| SEMA5A | 205405_at<br>213169_at                                   | Semaphorin 5A                        | PLXNB3                           | Promotes angiogenesis                                                                        | 40                   |
| SEMA6A | 215028_at<br>220454_s_at                                 | Semaphorin 6A                        | PLXNA2<br>PLXNA4                 | Soluble extracellular domain inhibits HUVEC migration                                        | 41                   |
|        |                                                          |                                      |                                  | Inhibition by a miRNA increases endothelial cell sprouting                                   | 42                   |
| SEMA6B | 220778_x_at                                              | Semaphorin 6B                        | PLXNA4                           | Silencing in HUVECs results in reduced response to VEGF and FGF                              | 27                   |
| SEMA6D | N/A                                                      | Semaphorin 6D                        | PLXNA1                           | Possibly promotes angiogenesis (causes VEGFR2 phosphorylation in some cells)                 | 43                   |
| SEMA7A | 210083_at                                                | Semaphorin 7A                        | PLXNC1                           | Induces corneal neovascularization                                                           | 44                   |

**Table S3: Receptor genes included in this study**

| <b>Gene</b> | <b>Probe ID</b>                                      | <b>Full Name</b> | <b>Interactions</b>                                              |
|-------------|------------------------------------------------------|------------------|------------------------------------------------------------------|
| FLT1        | 204406_at<br>210287_s_at                             | VEGF Receptor 1  | VEGFA<br>VEGFB<br>PGF                                            |
| KDR         | 203934_at                                            | VEGF Receptor 2  | VEGFA<br>VEGFC                                                   |
| FLT4        | 210316_at                                            | VEGF Receptor 3  | VEGFC                                                            |
| NRP1        | 210510_s_at<br>210615_at<br>212298_at                | Neuropilin 1     | VEGFA<br>VEGFB<br>PIGF<br>SEMA3A<br>SEMA3B<br>SEMA3C<br>SEMA3D   |
| NRP2        | 210841_s_at<br>210842_at<br>211844_s_at<br>214632_at | Neuropilin 2     | VEGFA<br>VEGFC<br>SEMA3B<br>SEMA3C<br>SEMA3D<br>SEMA3F<br>SEMA3G |
| PLXNA1      | 221537_at<br>221538_s_at                             | Plexin A1        | SEMA3*<br>SEMA6D                                                 |
| PLXNA2      | 207290_at<br>213030_s_at                             | Plexin A2        | SEMA3*<br>SEMA6A                                                 |
| PLXNA3      | 203623_at                                            | Plexin A3        | SEMA3*                                                           |
| PLXNA4      | N/A                                                  | Plexin A4        | SEMA3*<br>SEMA6A<br>SEMA6B                                       |
| PLXNB1      | 215668_s_at<br>215807_s_at                           | Plexin B1        | SEMA4D                                                           |
| PLXNB2      | 208890_s_at<br>211472_at                             | Plexin B2        | SEMA4C<br>SEMA4D                                                 |
| PLXNB3      | 205957_at                                            | Plexin B3        | SEMA5A                                                           |
| PLXNC1      | 206470_at<br>206471_s_at<br>213241_at                | Plexin C1        | SEMA7A                                                           |
| PLXND1      | 212235_at<br>38671_at                                | Plexin D1        | SEMA3E<br>SEMA4A                                                 |

\* SEMA3 family members bind plexinA receptors after binding to neuropilins, but it is unclear exactly which plexinAs interact with which SEMA3s.

**Table S4: Means and standard deviations of gene expression**

## Part A: Ligands

| Gene   | Probe       | Normal |           | All Tumors |           | TN Tumors |           | Non-TN Tumors |           |
|--------|-------------|--------|-----------|------------|-----------|-----------|-----------|---------------|-----------|
|        |             | Mean   | Std. Dev. | Mean       | Std. Dev. | Mean      | Std. Dev. | Mean          | Std. Dev. |
| VEGFA  | 210512 s at | 8.91   | 0.35      | 8.84       | 0.96      | 9.16      | 1.14      | 8.70          | 0.83      |
|        | 210513 s at | 5.91   | 0.22      | 7.22       | 0.72      | 7.62      | 0.84      | 7.06          | 0.60      |
|        | 211527 x at | 5.76   | 0.33      | 6.95       | 0.89      | 7.41      | 1.08      | 6.77          | 0.71      |
|        | 212171 x at | 7.54   | 0.21      | 8.72       | 0.64      | 9.02      | 0.80      | 8.60          | 0.51      |
| VEGFB  | 203683 s at | 5.63   | 0.36      | 6.52       | 0.51      | 6.44      | 0.54      | 6.55          | 0.50      |
| VEGFC  | 209946 at   | 5.88   | 0.38      | 6.32       | 0.52      | 6.22      | 0.56      | 6.36          | 0.50      |
| PGF    | 209652 s at | 6.07   | 0.46      | 5.92       | 0.38      | 5.97      | 0.44      | 5.90          | 0.35      |
|        | 215179 x at | 9.96   | 0.40      | 8.91       | 0.60      | 8.90      | 0.70      | 8.91          | 0.56      |
| SEMA3A | 206805 at   | 4.85   | 0.23      | 5.16       | 0.33      | 5.26      | 0.37      | 5.11          | 0.30      |
| SEMA3B | 203070 at   | 5.75   | 0.24      | 5.91       | 0.29      | 5.97      | 0.28      | 5.89          | 0.29      |
|        | 203071 at   | 6.38   | 0.62      | 6.74       | 0.76      | 6.30      | 0.43      | 6.92          | 0.79      |
| SEMA3C | 203788 s at | 6.00   | 0.40      | 5.76       | 0.67      | 5.42      | 0.50      | 5.90          | 0.68      |
|        | 203789 s at | 9.41   | 0.52      | 8.29       | 1.39      | 7.13      | 1.36      | 8.76          | 1.09      |
| SEMA3D | 215324 at   | 3.90   | 0.13      | 3.90       | 0.14      | 3.91      | 0.14      | 3.89          | 0.14      |
| SEMA3E | 206941 x at | 4.06   | 0.24      | 3.80       | 0.23      | 3.72      | 0.17      | 3.83          | 0.24      |
| SEMA3F | 206832 s at | 4.36   | 0.26      | 4.85       | 0.43      | 4.64      | 0.31      | 4.94          | 0.44      |
|        | 209730 at   | 6.89   | 0.37      | 6.96       | 0.46      | 6.73      | 0.42      | 7.05          | 0.44      |
|        | 35666 at    | 8.57   | 0.45      | 8.53       | 0.61      | 8.00      | 0.46      | 8.74          | 0.52      |
| SEMA3G | 219689 at   | 7.18   | 0.86      | 6.58       | 0.66      | 6.38      | 0.70      | 6.66          | 0.62      |
| SEMA4A | 219259 at   | 8.02   | 0.30      | 8.16       | 0.38      | 8.25      | 0.39      | 8.12          | 0.36      |
| SEMA4C | 219039 at   | 8.10   | 0.30      | 8.02       | 0.35      | 8.04      | 0.34      | 8.02          | 0.36      |
|        | 46665 at    | 9.79   | 0.35      | 9.01       | 0.51      | 9.00      | 0.51      | 9.01          | 0.52      |
| SEMA4D | 203528 at   | 7.35   | 0.37      | 7.42       | 0.60      | 7.67      | 0.68      | 7.31          | 0.53      |
| SEMA5A | 205405 at   | 7.85   | 0.61      | 6.89       | 0.49      | 6.81      | 0.45      | 6.93          | 0.50      |
|        | 213169 at   | 8.95   | 0.80      | 6.90       | 0.64      | 6.71      | 0.62      | 6.98          | 0.64      |
| SEMA6A | 215028 at   | 6.59   | 0.88      | 4.10       | 0.57      | 4.03      | 0.43      | 4.13          | 0.61      |
|        | 220454 s at | 5.92   | 0.27      | 6.62       | 0.39      | 6.71      | 0.38      | 6.59          | 0.39      |
| SEMA6B | 220778 x at | 6.89   | 0.28      | 7.02       | 0.29      | 7.03      | 0.30      | 7.02          | 0.29      |
| SEMA7A | 210083 at   | 6.09   | 0.20      | 6.32       | 0.37      | 6.37      | 0.38      | 6.29          | 0.36      |

**Table S4: Means and standard deviations of gene expression**

## Part B: Receptors

| Gene   | Probe       | Normal |           | All Tumors |           | TN Tumors |       | Non-TN Tumors |           |
|--------|-------------|--------|-----------|------------|-----------|-----------|-------|---------------|-----------|
|        |             | Mean   | Std. Dev. | Mean       | Std. Dev. | Gene      | Probe | Mean          | Std. Dev. |
| FLT1   | 204406_at   | 5.37   | 0.17      | 5.33       | 0.24      | 5.37      | 0.21  | 5.32          | 0.25      |
|        | 210287_s_at | 3.76   | 0.15      | 3.79       | 0.17      | 3.83      | 0.17  | 3.78          | 0.16      |
| KDR    | 203934_at   | 6.23   | 0.60      | 6.02       | 0.49      | 5.94      | 0.50  | 6.05          | 0.48      |
| FLT4   | 210316_at   | 4.43   | 0.21      | 4.35       | 0.21      | 4.38      | 0.24  | 4.34          | 0.20      |
| NRP1   | 210510_s_at | 5.52   | 0.28      | 6.18       | 0.53      | 6.30      | 0.63  | 6.13          | 0.48      |
|        | 210615_at   | 4.16   | 0.18      | 4.47       | 0.25      | 4.52      | 0.26  | 4.45          | 0.24      |
|        | 212298_at   | 6.09   | 0.77      | 6.48       | 1.00      | 6.41      | 1.08  | 6.51          | 0.97      |
| NRP2   | 210841_s_at | 6.40   | 0.19      | 6.81       | 0.28      | 6.92      | 0.29  | 6.76          | 0.26      |
|        | 210842_at   | 4.78   | 0.24      | 4.85       | 0.34      | 4.94      | 0.36  | 4.82          | 0.32      |
|        | 211844_s_at | 4.43   | 0.16      | 4.72       | 0.25      | 4.82      | 0.33  | 4.68          | 0.20      |
|        | 214632_at   | 4.59   | 0.18      | 4.99       | 0.41      | 5.17      | 0.55  | 4.91          | 0.31      |
| PLXNA1 | 221537_at   | 6.95   | 0.40      | 7.04       | 0.30      | 7.16      | 0.30  | 6.98          | 0.27      |
|        | 221538_s_at | 7.67   | 0.80      | 7.23       | 0.66      | 7.45      | 0.73  | 7.14          | 0.60      |
| PLXNA2 | 207290_at   | 4.80   | 0.16      | 4.97       | 0.30      | 5.03      | 0.31  | 4.94          | 0.29      |
|        | 213030_s_at | 5.54   | 0.24      | 6.13       | 0.54      | 6.26      | 0.62  | 6.08          | 0.50      |
| PLXNA3 | 203623_at   | 6.68   | 0.24      | 6.94       | 0.47      | 6.92      | 0.47  | 6.95          | 0.48      |
| PLXNB1 | 215668_s_at | 6.68   | 0.27      | 6.89       | 0.37      | 6.93      | 0.37  | 6.88          | 0.37      |
|        | 215807_s_at | 6.66   | 0.48      | 7.24       | 0.68      | 6.99      | 0.59  | 7.34          | 0.68      |
| PLXNB2 | 208890_s_at | 8.74   | 0.99      | 9.24       | 0.68      | 9.05      | 0.71  | 9.32          | 0.66      |
|        | 211472_at   | 5.86   | 0.22      | 5.92       | 0.30      | 5.97      | 0.32  | 5.90          | 0.29      |
| PLXNB3 | 205957_at   | 6.18   | 0.28      | 6.46       | 0.39      | 6.54      | 0.40  | 6.43          | 0.38      |
| PLXNC1 | 206470_at   | 5.37   | 0.15      | 5.86       | 0.48      | 5.91      | 0.52  | 5.84          | 0.46      |
|        | 206471_s_at | 4.64   | 0.46      | 5.11       | 0.40      | 5.15      | 0.42  | 5.09          | 0.38      |
|        | 213241_at   | 6.78   | 0.67      | 7.17       | 0.90      | 7.01      | 0.96  | 7.23          | 0.88      |
| PLXND1 | 212235_at   | 7.12   | 0.51      | 7.40       | 0.52      | 7.35      | 0.57  | 7.42          | 0.49      |
|        | 38671_at    | 8.11   | 0.41      | 8.56       | 0.55      | 8.48      | 0.59  | 8.59          | 0.52      |

**Table S5: Clinical trial results for bevacizumab by hormone receptor status**

| <b>Trial</b>                                                                            | <b>Response</b>                         | <b>Subgroup</b>                | <b>Control Group</b> | <b>Avastin Group</b> | <b>Hazard Ratio</b> | <b>Reference</b> |
|-----------------------------------------------------------------------------------------|-----------------------------------------|--------------------------------|----------------------|----------------------|---------------------|------------------|
| Phase 3 trial of paclitaxel plus bevacizumab in metastatic breast cancer                | Median PFS (months)                     | ER-/PR-                        | 4.6                  | 8.8                  | 0.53                | 12               |
|                                                                                         |                                         | ER+/PR+                        | 8                    | 14.4                 | 0.54                |                  |
| Phase 3 trial of docetaxel plus bevacizumab in metastatic breast cancer                 | Median PFS (months)                     | ER-/PR-                        | N/A                  | N/A                  | 0.68                | 52               |
|                                                                                         |                                         | ER+/PR+                        | N/A                  | N/A                  | 0.77                |                  |
| Phase 3 trial of two types of chemotherapy plus bevacizumab in metastatic breast cancer | Median PFS (months)                     | Capecitabine ER-/PR-           | 4.2                  | 6.1                  | 0.70                | 53               |
|                                                                                         |                                         | Capecitabine ER+/PR+           | 6.2                  | 9.2                  | 0.69                |                  |
|                                                                                         | Median PFS (months)                     | Taxane + Anthracycline ER-/PR- | 6.2                  | 6.5                  | 0.78                |                  |
|                                                                                         |                                         | Taxane + Anthracycline ER+/PR+ | 8.2                  | 10.3                 | 0.61                |                  |
| Neoadjuvant bevacizumab with chemotherapy                                               | Pathological complete response rate (%) | ER-/PR-                        | 47.1                 | 51.5                 | N/A                 | 54               |
|                                                                                         |                                         | ER+/PR+                        | 15.1                 | 23.2                 | N/A                 |                  |
| Neoadjuvant bevacizumab with chemotherapy                                               | Pathological complete response rate (%) | ER-/PR-                        | 27.9                 | 39.3                 | N/A                 | 55               |
|                                                                                         |                                         | ER+/PR+                        | 7.8                  | 7.7                  | N/A                 |                  |



**Table S6: Genes associated with VEGF- and semaphorin-based principal component 3a**

| Gene     | Probe ID    | Correlation coefficient | Gene     | Probe ID    | Correlation coefficient |
|----------|-------------|-------------------------|----------|-------------|-------------------------|
| APLNR    | 213592 at   | 0.6410                  | SEMA5A   | 213169 at   | 0.5313                  |
| SYDE1    | 44702 at    | 0.6204                  | ANGPTL2  | 213001 at   | 0.5307                  |
| SVEP1    | 213247 at   | 0.6169                  | ABCA6    | 217504 at   | 0.5303                  |
| IFFO1    | 209721 s at | 0.6074                  | SYT11    | 209197 at   | 0.5300                  |
| CD34     | 209543 s at | 0.5992                  | SEPT11   | 214293 at   | 0.5270                  |
| HEG1     | 212822 at   | 0.5879                  | ERG      | 213541 s at | 0.5260                  |
| CD93     | 202877 s at | 0.5850                  | PECAM1   | 208982 at   | 0.5247                  |
| NPR1     | 32625 at    | 0.5793                  | TOMM20   | 200662 s at | -0.5252                 |
| ARHGEF15 | 205507 at   | 0.5773                  | ARL6IP1  | 211935 at   | -0.5254                 |
| PDE2A    | 204134 at   | 0.5750                  | NHP2     | 209104 s at | -0.5278                 |
| PCDH12   | 219656 at   | 0.5744                  | POLR2K   | 202635 s at | -0.5287                 |
| FOLR2    | 204829 s at | 0.5730                  | TBCA     | 203667 at   | -0.5292                 |
| GAS7     | 211067 s at | 0.5675                  | MYCBP    | 203360 s at | -0.5317                 |
| ITIH5    | 219064 at   | 0.5648                  | CBX3     | 201091 s at | -0.5329                 |
| MFNG     | 204153 s at | 0.5623                  | RBM35A   | 219121 s at | -0.5338                 |
| FEZ1     | 203562 at   | 0.5621                  | NDUFB4   | 218226 s at | -0.5350                 |
| STAB1    | 38487 at    | 0.5612                  | PAFAH1B3 | 203228 at   | -0.5368                 |
| GJA4     | 204904 at   | 0.5562                  | TSEN34   | 218132 s at | -0.5405                 |
| SELP     | 206049 at   | 0.5550                  | PAICS    | 201013 s at | -0.5414                 |
| S1PR1    | 204642 at   | 0.5530                  | MIF      | 217871 s at | -0.5428                 |
| JAM2     | 219213 at   | 0.5489                  | EPCAM    | 201839 s at | -0.5451                 |
| ADAMTS2  | 214454 at   | 0.5470                  | ARF1     | 200065 s at | -0.5469                 |
| GPR124   | 221814 at   | 0.5457                  | SNRPE    | 203316 s at | -0.5472                 |
| LRP1     | 200785 s at | 0.5428                  | FKBP4    | 200894 s at | -0.5495                 |
| NOTCH4   | 205247 at   | 0.5407                  | PRDX2    | 39729 at    | -0.5559                 |
| RBMS3    | 206767 at   | 0.5406                  | RAB25    | 218186 at   | -0.5566                 |
| FAT4     | 219427 at   | 0.5402                  | SRP9     | 201273 s at | -0.5616                 |
| LUZP1    | 221832 s at | 0.5390                  | NDUFAB1  | 202077 at   | -0.5671                 |
| CORO2B   | 209789 at   | 0.5376                  | PTGES3   | 200627 at   | -0.5682                 |
| EHD2     | 221870 at   | 0.5353                  | TPD52    | 201689 s at | -0.5771                 |
| MMP19    | 204575 s at | 0.5352                  | SPINT2   | 210715 s at | -0.5815                 |
| F13A1    | 203305 at   | 0.5326                  | HSPE1    | 205133 s at | -0.5905                 |

**Table S7: Genes associated with VEGF- and semaphorin-based principal component 4a**

| Gene     | Probe ID    | Correlation coefficient | Gene    | Probe ID    | Correlation coefficient |
|----------|-------------|-------------------------|---------|-------------|-------------------------|
| C14orf45 | 220173_at   | 0.6066                  | PLXNA1  | 221538_s_at | -0.5135                 |
| ESR1     | 202225_at   | 0.5999                  | AURKB   | 209464_at   | -0.5144                 |
| CA12     | 203963_at   | 0.5997                  | SLC43A3 | 213113_s_at | -0.5145                 |
| GATA3    | 209603_at   | 0.5822                  | BOP1    | 212563_at   | -0.5155                 |
| ERBB4    | 214053_at   | 0.5805                  | MICALL1 | 55081_at    | -0.5160                 |
| PNPLA4   | 209603_at   | 0.5762                  | KIF2C   | 209408_at   | -0.5162                 |
| FOXA1    | 204667_at   | 0.5707                  | VGLL1   | 215729_s_at | -0.5174                 |
| NME5     | 206197_at   | 0.5703                  | UBE2C   | 202954_at   | -0.5189                 |
| AGR2     | 209173_at   | 0.5683                  | BUB1    | 209642_at   | -0.5189                 |
| SCUBE2   | 219197_s_at | 0.5667                  | MYBL2   | 201710_at   | -0.5191                 |
| ABAT     | 209460_at   | 0.5636                  | RHBDF2  | 219202_at   | -0.5191                 |
| PTGER3   | 213933_at   | 0.5633                  | TTK     | 204822_at   | -0.5213                 |
| TBC1D9   | 212956_at   | 0.5624                  | FSCN1   | 201564_s_at | -0.5249                 |
| MLPH     | 218211_s_at | 0.5613                  | COTL1   | 221059_s_at | -0.5256                 |
| DNAJC12  | 218976_at   | 0.5593                  | NCK2    | 203315_at   | -0.5283                 |
| GOLSYN   | 218692_at   | 0.5576                  | TPX2    | 210052_s_at | -0.5319                 |
| NAT1     | 214440_at   | 0.5557                  | TMEM158 | 213338_at   | -0.5332                 |
| GPD1L    | 212510_at   | 0.5420                  | PLOD1   | 200827_at   | -0.5337                 |
| HEXIM1   | 202815_s_at | 0.5359                  | CTPS    | 202613_at   | -0.5337                 |
| COX16    | 217645_at   | 0.5299                  | PLOD3   | 202185_at   | -0.5426                 |
| BCL2     | 203685_at   | 0.5244                  | SF3B3   | 200687_s_at | -0.5445                 |
| TFF1     | 205009_at   | 0.5234                  | GLT25D1 | 218473_s_at | -0.5457                 |
| MAPT     | 203929_s_at | 0.5198                  | IRAK1   | 201587_s_at | -0.5544                 |
| PEX11A   | 205160_at   | 0.5183                  | EN1     | 220559_at   | -0.5605                 |
| SEMA3C   | 203789_s_at | 0.5157                  | HMGA1   | 206074_s_at | -0.5649                 |
| SLC22A5  | 205074_at   | 0.5143                  | FOXO1   | 202580_x_at | -0.5674                 |
| IL6ST    | 204863_s_at | 0.5139                  | TTL4    | 203702_s_at | -0.5711                 |
| MYB      | 204798_at   | 0.5127                  | CEBPB   | 212501_at   | -0.5742                 |
| HNRPDL   | 209068_at   | 0.5119                  | MCM5    | 216237_s_at | -0.5758                 |
| CDKN2A   | 209644_x_at | -0.5116                 | CDC20   | 202870_s_at | -0.5900                 |
| MCAM     | 211042_x_at | -0.5125                 | SLC7A5  | 201195_s_at | -0.5963                 |
| MKI67    | 212022_s_at | -0.5133                 |         |             |                         |

Figure S1.

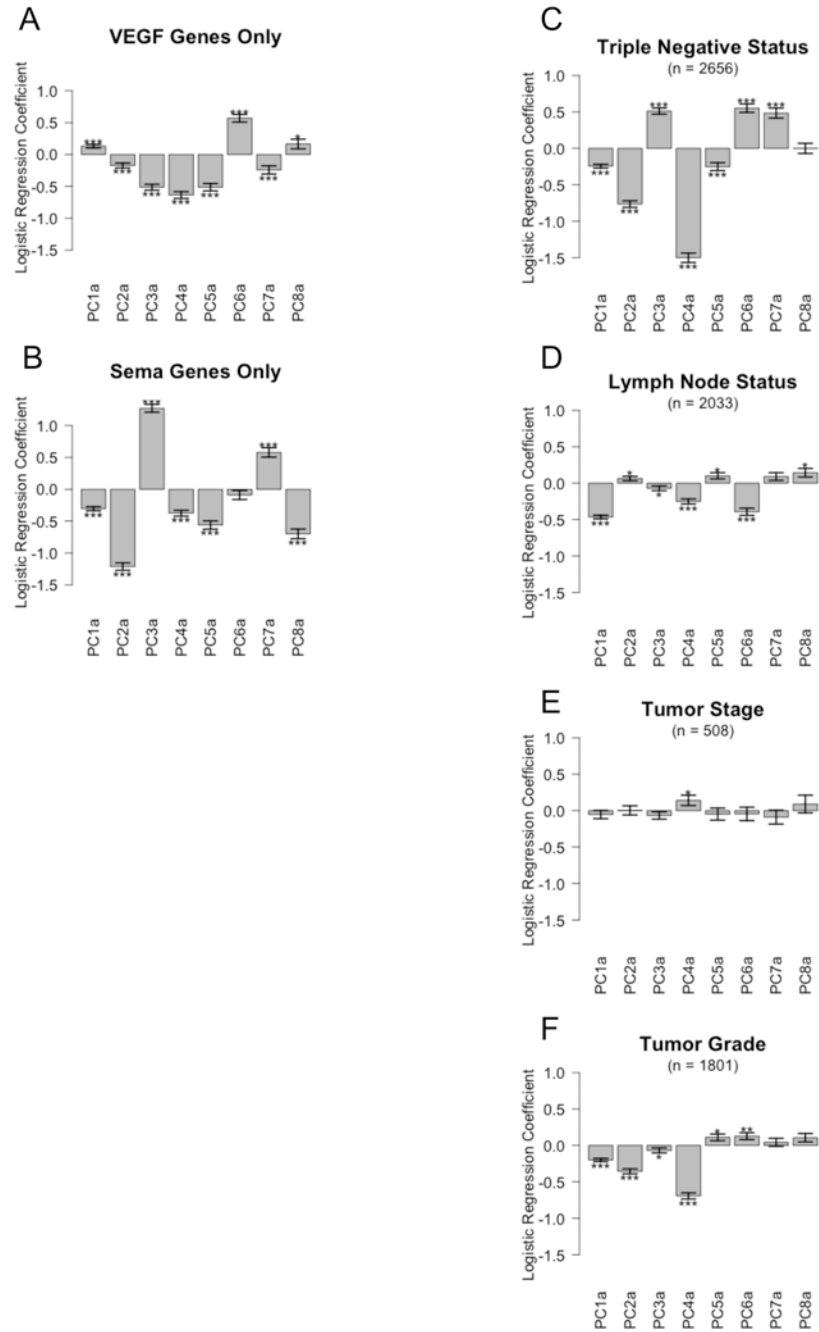

**Figure S1: Relationship between principal component analysis (PCA) scores and triple negative status for tumor data set.** A-B, Logistic regression coefficients for the first eight PCA scores for VEGF-related genes only (A) and for the semaphorin related genes only (B). The probe sets for NRP1 and NRP2 were included in both subsets of the data. C-F, Logistic regression coefficients for the combined VEGF/semaphorin geneset for triple negative status (C), lymph node status (D), tumor stage (E), and tumor grade (F). The value of n in C-F indicates how many samples had the relevant annotated data available.

**Figure S2.**

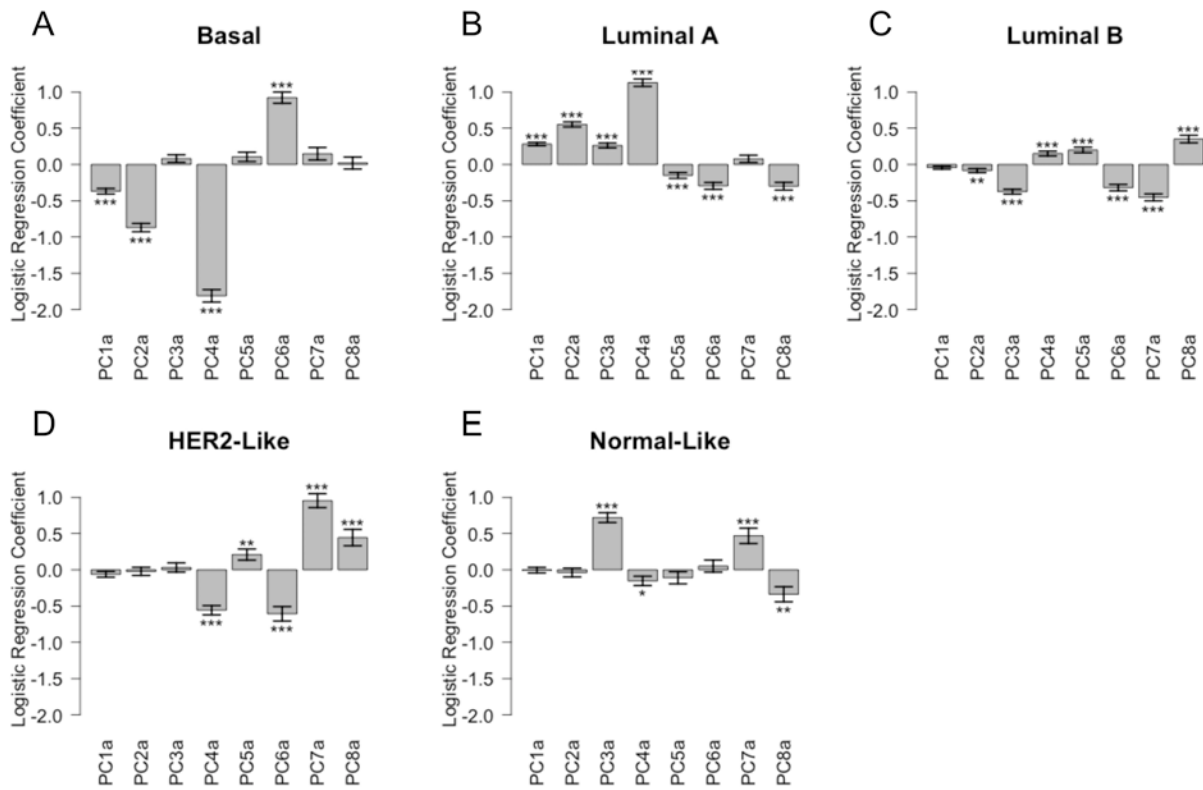

**Figure S2: Association of PCA scores with PAM50 subtypes.** Logistic regression coefficients for the first 8 PCs of the data set comprising all of the tumors. The largest association was between the 4<sup>th</sup> PC and the basal subtype (A). The 4<sup>th</sup> PC had a large inverse association with the luminal A subtype (B). The coefficients for the luminal B (C), HER2-like (D), and normal-like (E) subtypes were relatively small.

**Figure S3.**

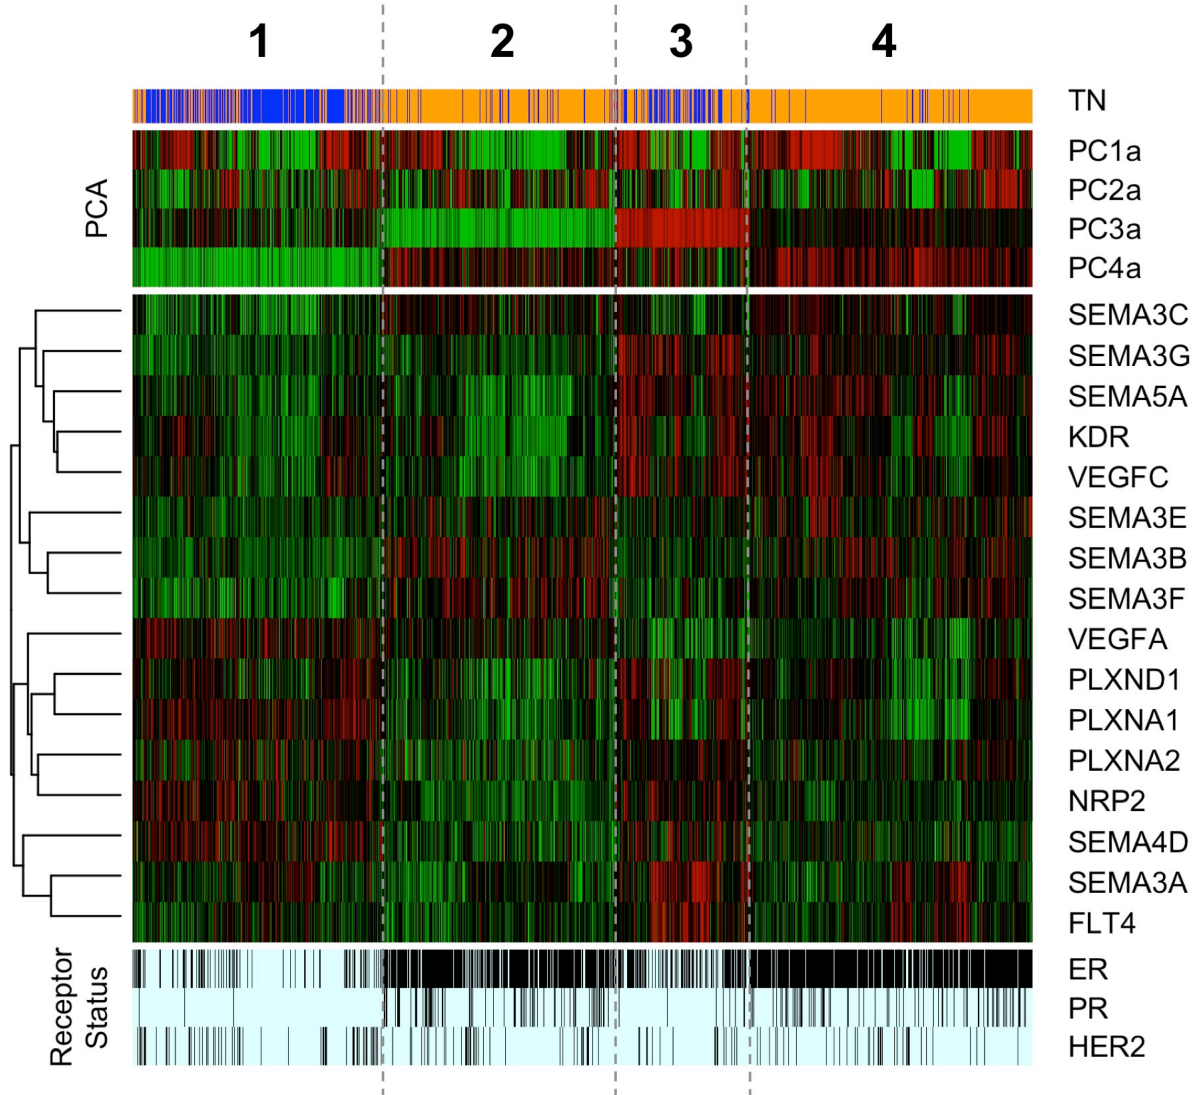

**Figure S3: Heatmap of clusters based only on PC3a and PC4a.** K-means cluster analysis of only the two principal components with high correlations with TN status (PC3a and PC4a) revealed two clusters with high TN content (1 and 3), and two with low prevalence of TNBC (2 and 4). Receptor status (light blue for negative, black for positive) for ER, PR, and HER2 showed that ER status was most associated with the VEGF/Sema gene expression.

The four clusters in the heatmap corresponded to:

(1) high VEGFA, SEMA4D, NRP2, PLXNA1, and low SEMA3B, SEMA3C, SEMA3E, SEMA3F, SEMA3G;

(2) high SEMA3B, SEMA3C, SEMA3F;

(3) high VEGFC, KDR, SEMA3G, SEMA5A and low VEGFA, SEMA3B, SEMA3C, SEMA3E, SEMA3F; and

(4) no consistent pattern of expression.

Most TNBC samples fell into the high VEGFA/SEMA4D cluster, with the high VEGFC/SEMA3G cluster containing the next highest amount of TNBC samples. Notably, both cluster 1 and cluster

3 demonstrated low expression of the anti-angiogenic genes SEMA3B, SEMA3C, SEMA3E, and SEMA3F. Among ER status, PR status, and HER2 status, ER and PR appeared to have a significant association with the clustering pattern, with ER-/PR-negative samples predominant in the high VEGFA/SEMA4D and high VEGFC/ NRP1/NRP2/PLXND1 clusters and ER-/PR-positive samples predominant in the other two clusters. This may indicate an important role for ER and PR in the transcription of the VEGF- and semaphorin-related genes considered here.

Figure S4.

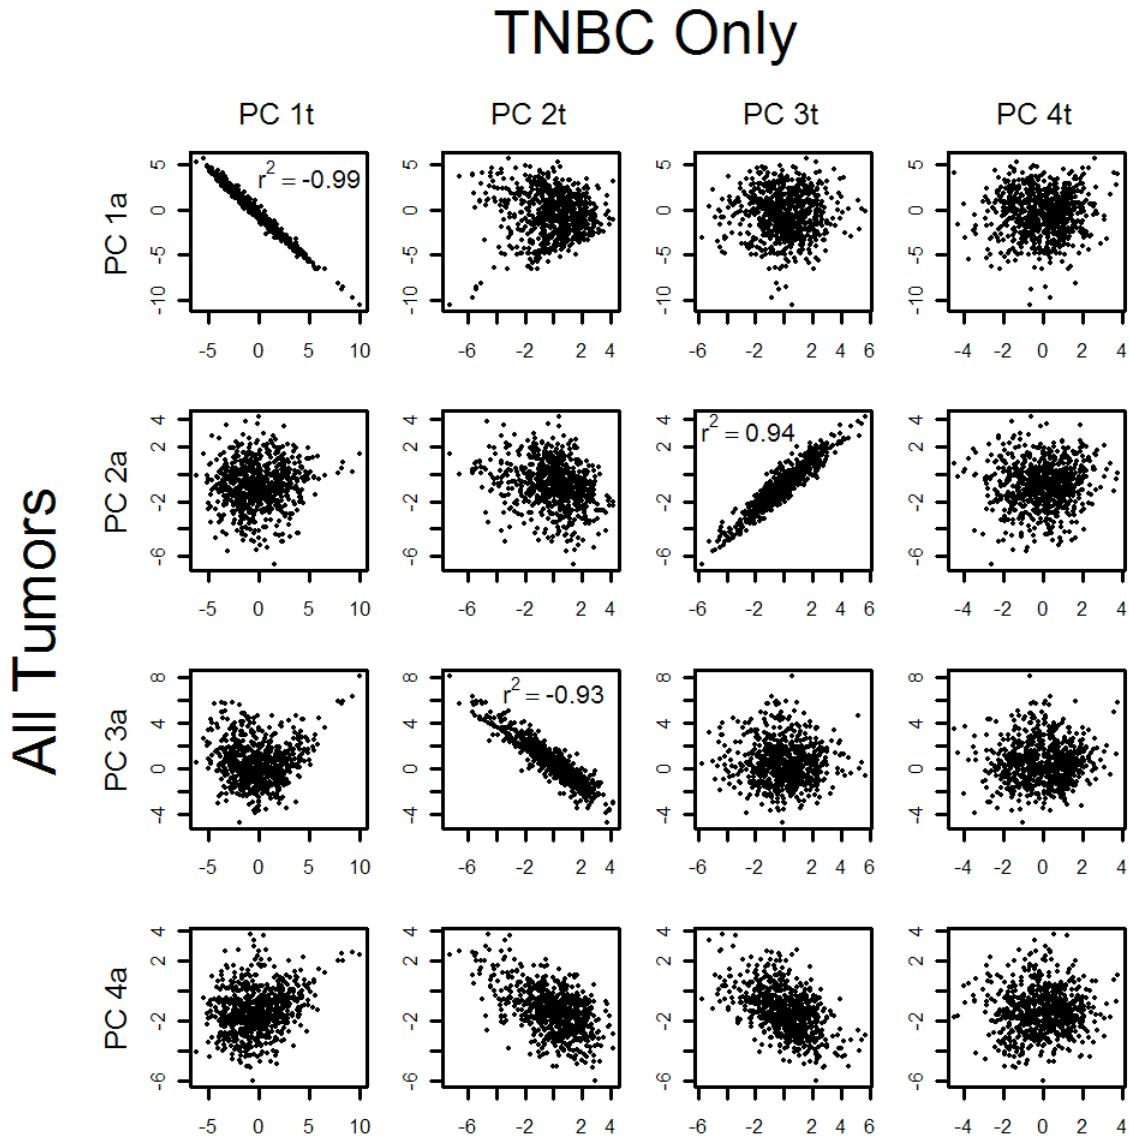

**Figure S4: Relationship between PCA of all tumors and PCA of TNBC samples only.**

Scatterplots of the scores for TNBC samples from the all-tumor PCA and from the TNBC-only PCA reveal that PC1 is highly inversely correlated between the two analyses. Tumor PC2a is positively correlated with TNBC PC3t, while tumor PC3a is negatively correlated with TNBC PC2t. Tumor PC4a has no corresponding component in the TNBC PCA; this is due to the lack of variation of this component in the TNBC dataset (TNBC tumors typically score lowly on the 4<sup>th</sup> tumor PC).

Figure S5.

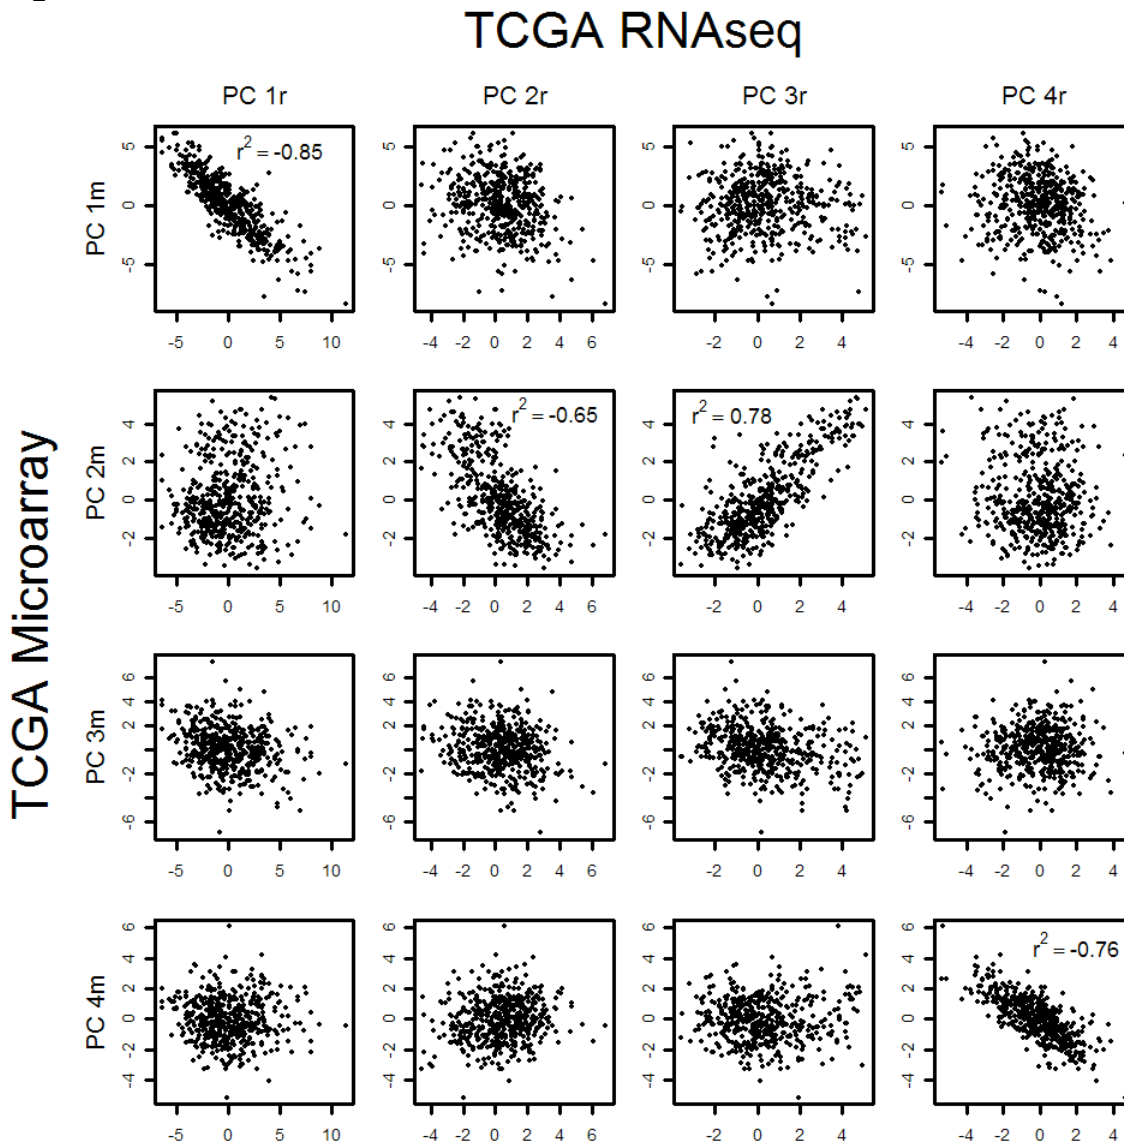

**Figure S5: Relationship between PCA scores of overlapping samples from two TCGA datasets.** Scatterplots of the scores for TCGA samples analyzed by microarray and by RNA-Seq show a strong correlation between the first component for each platform. The correlation of PC2m scores with both PC2r and PC3r scores is consistent with the relationships of these components with TN status (see figure 6).



Figure S6.

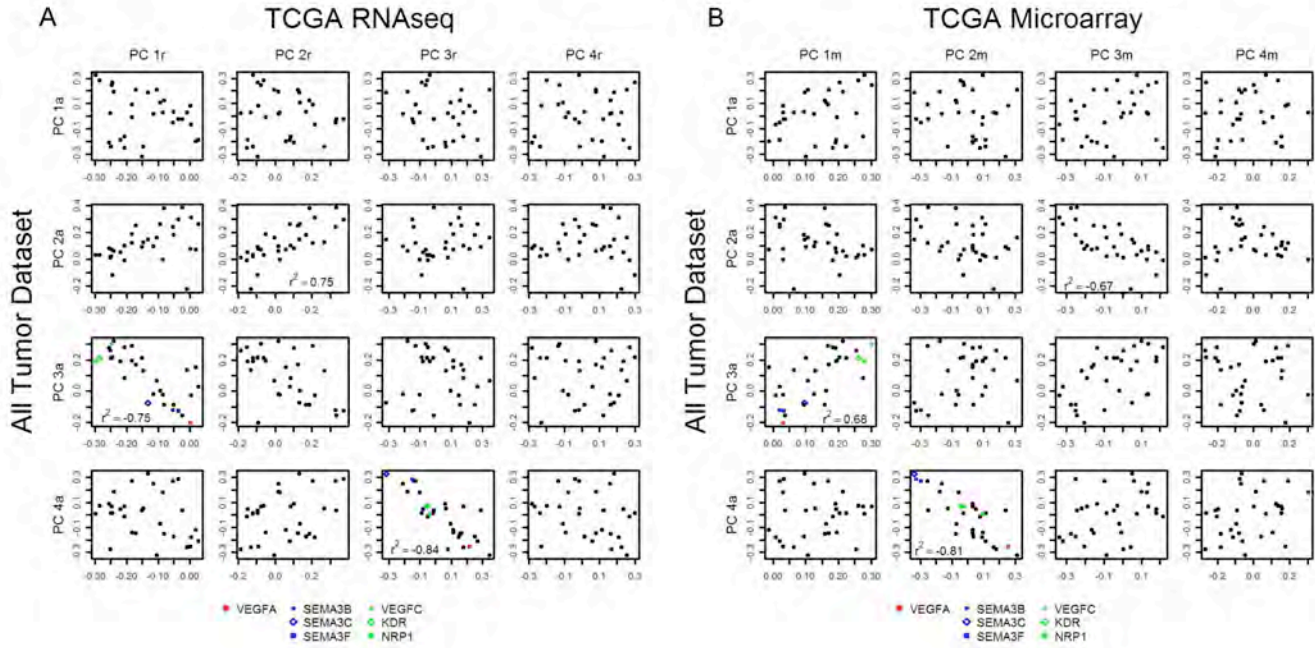

**Figure S6: Correlation of PCA loadings vectors between all tumor dataset and TCGA datasets.** **A**, Gene loadings between the 2,656-tumor GEO dataset and the TCGA RNA-Seq dataset showed weak correlations for several components. Importantly, patterns of gene expression were conserved across datasets/platforms: PC4a/PC3r had VEGFA expression and SEMA3B/3C/3F loading in opposite directions. **B**, Gene loadings between the 2,656-tumor GEO dataset and the TCGA microarray dataset also showed weak correlations for several components. In this case, PC4a and PC2t shared the VEGF/SEMA3 signature.

**Figure S7.**

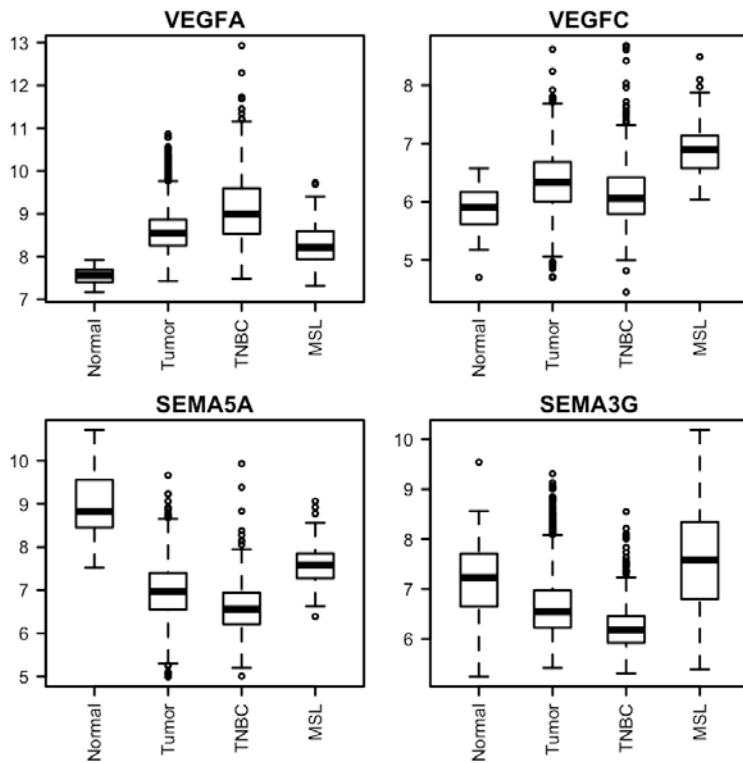

**Figure S7: Gene expression of the MSL subtype.** The MSL TNBC subtype had many genes whose expression resembled the all-tumor dataset more than the TNBC dataset, including VEGFA, SEMA5A, and SEMA3G. An exception to this was VEGFC, which had higher expression in the MSL subtype than in any other grouping.

Figure S8.

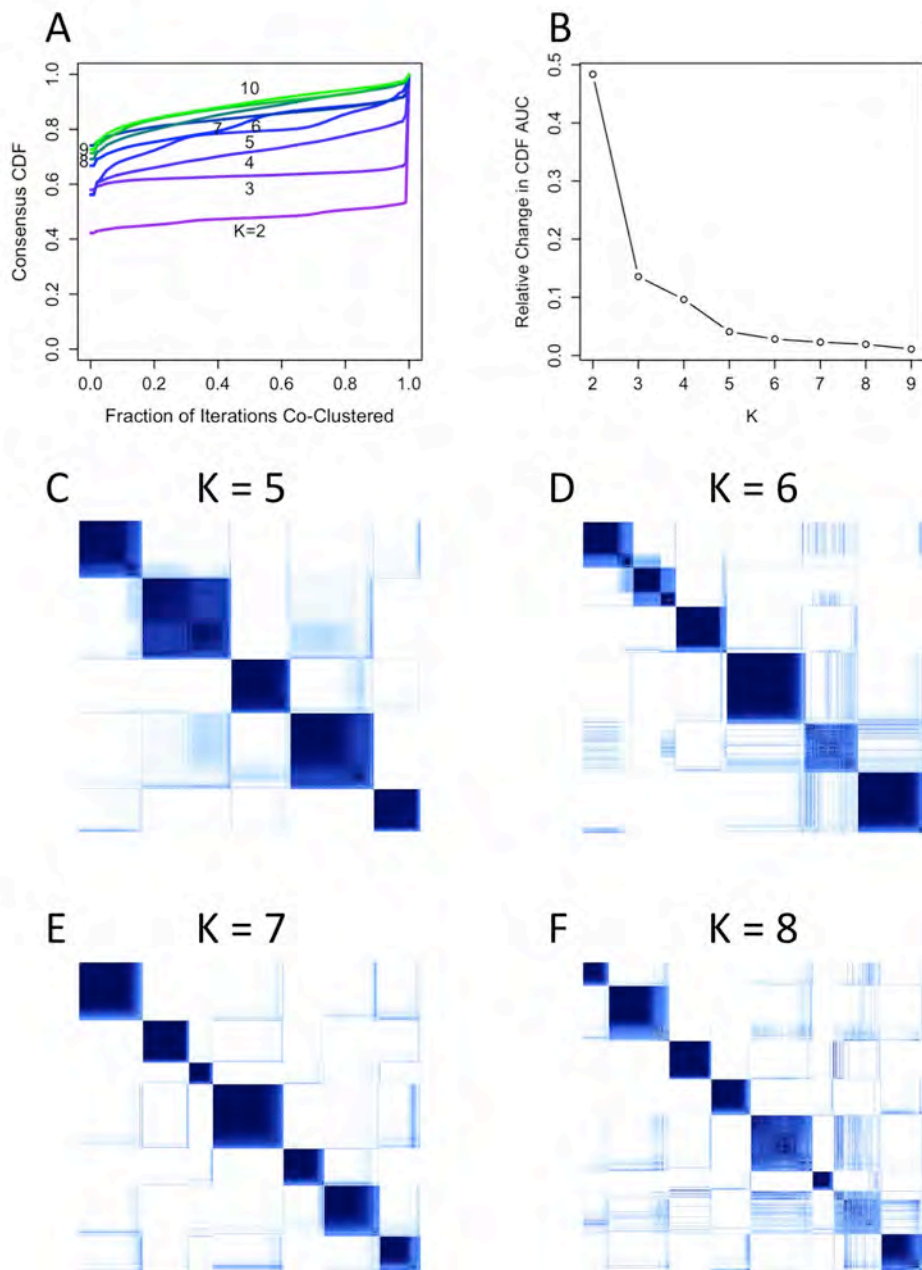

**Figure S8: Consensus  $K$ -means clustering of all tumor samples.** **A**, Cumulative consensus distribution curves showing the fraction of samples that co-clustered during 100 iterations of the  $K$ -means algorithm for all tumors. **B**, Relative change in area under the consensus CDF for  $K = 2$  through 9. **C-F**, Consensus matrices for  $K = 5$  through 8, with darker shades of blue indicating sample pairs that co-clustered more frequently.

Figure S9.

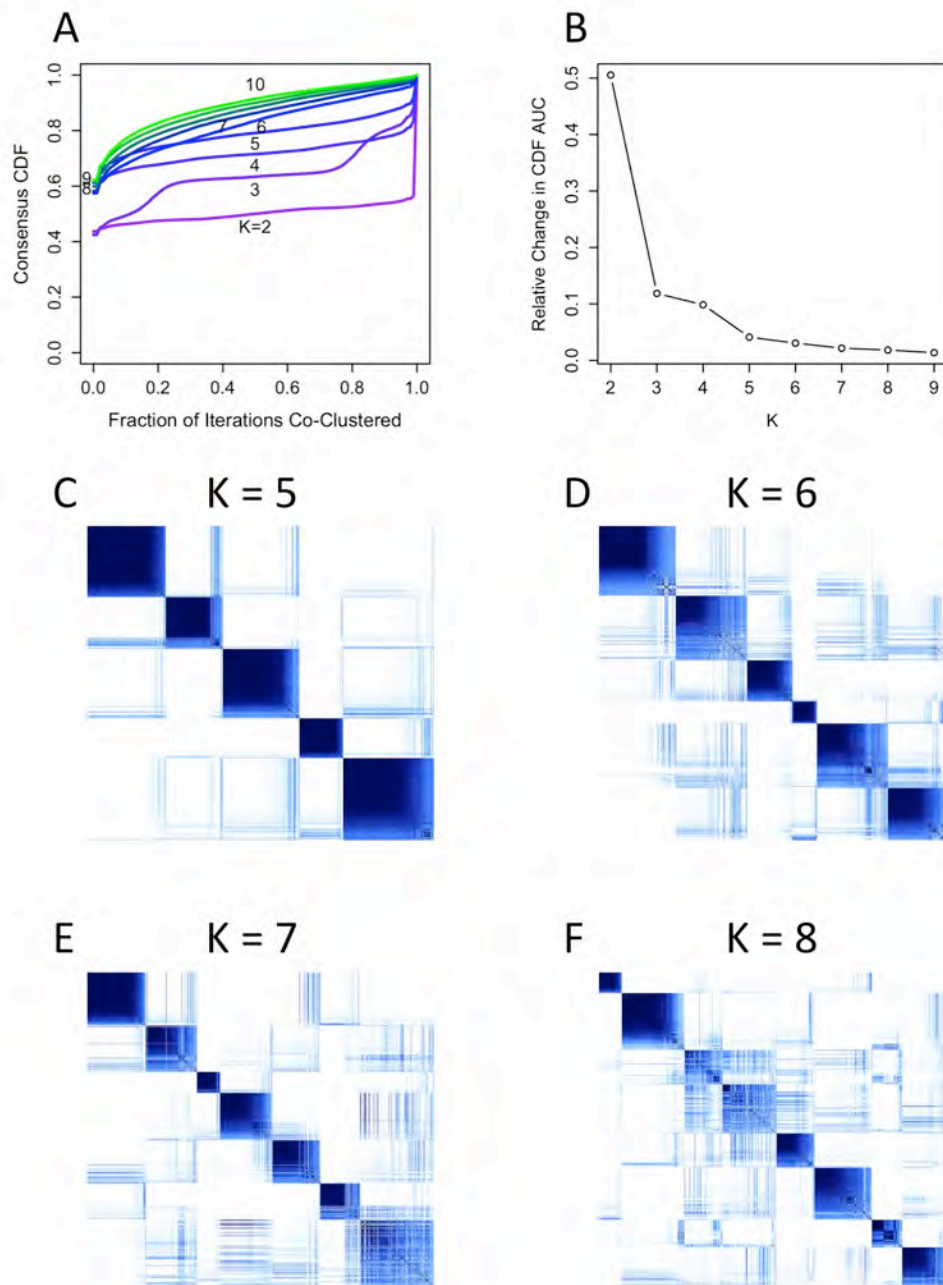

**Figure S9: Consensus  $K$ -means clustering of TNBCs.** **A**, Cumulative consensus distribution curves showing the fraction of samples that co-clustered during 100 iterations of the  $K$ -means algorithm for TNBC tumors. **B**, Relative change in area under the consensus CDF for  $K = 2$  through 9. **C-F**, Consensus matrices for  $K = 5$  through 8, with darker shades of blue indicating sample pairs that co-clustered more frequently.

**Figure S10.**

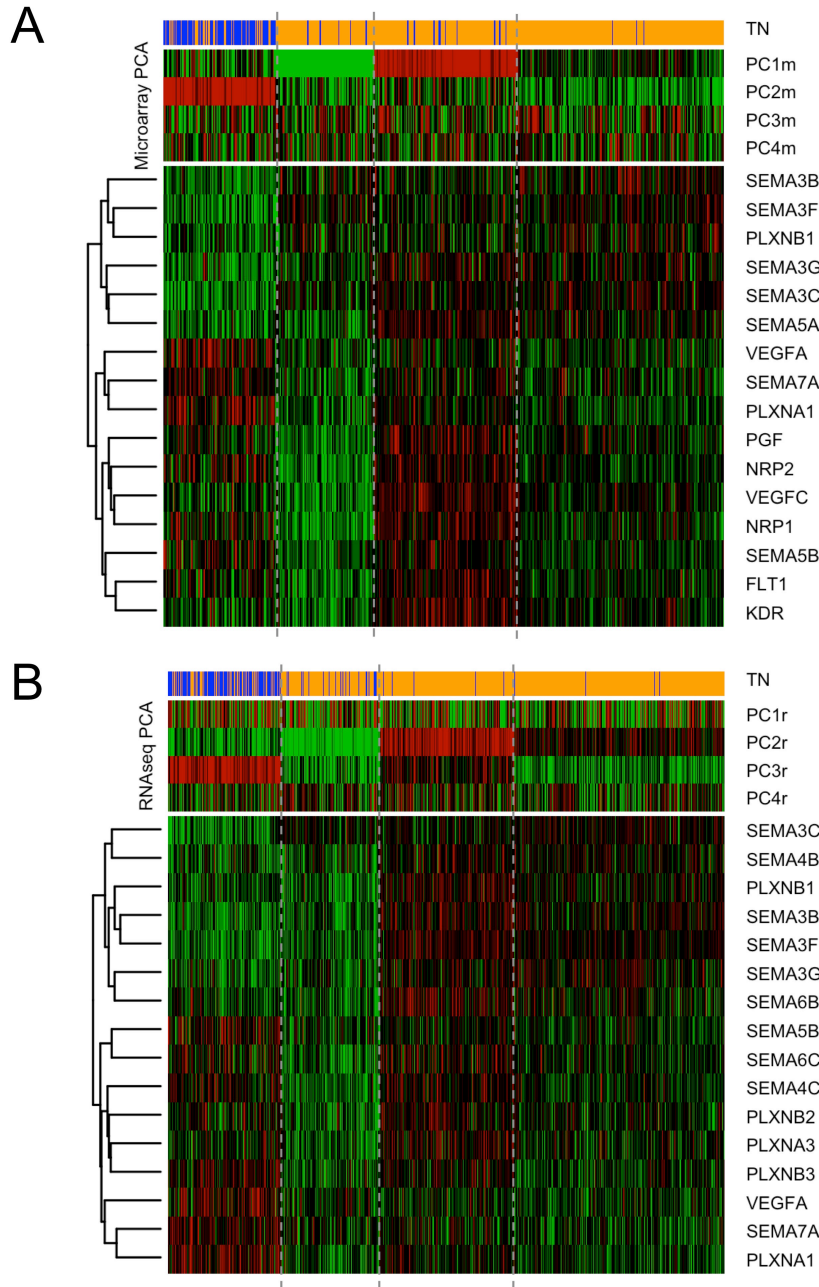

**Figure S10: Heatmaps of TCGA data. A,** Microarray data from Figures 6A and 6B were clustered based on the 1<sup>st</sup> and 2<sup>nd</sup> principal component scores of the 537 samples (columns). The genes included here (rows) were those whose 1<sup>st</sup> and 2<sup>nd</sup> PC loadings vector had a magnitude greater than 0.24. **B,** RNAseq data from Figures 6C and 6D were clustered based on the 2<sup>nd</sup> and 3<sup>rd</sup> principal components of 750 samples. The genes included here were those whose 2<sup>nd</sup> and 3<sup>rd</sup> PC loadings vector had a magnitude greater than 0.23. In both heatmaps, red indicates high expression and green indicates low expression.

**Figure S11.**

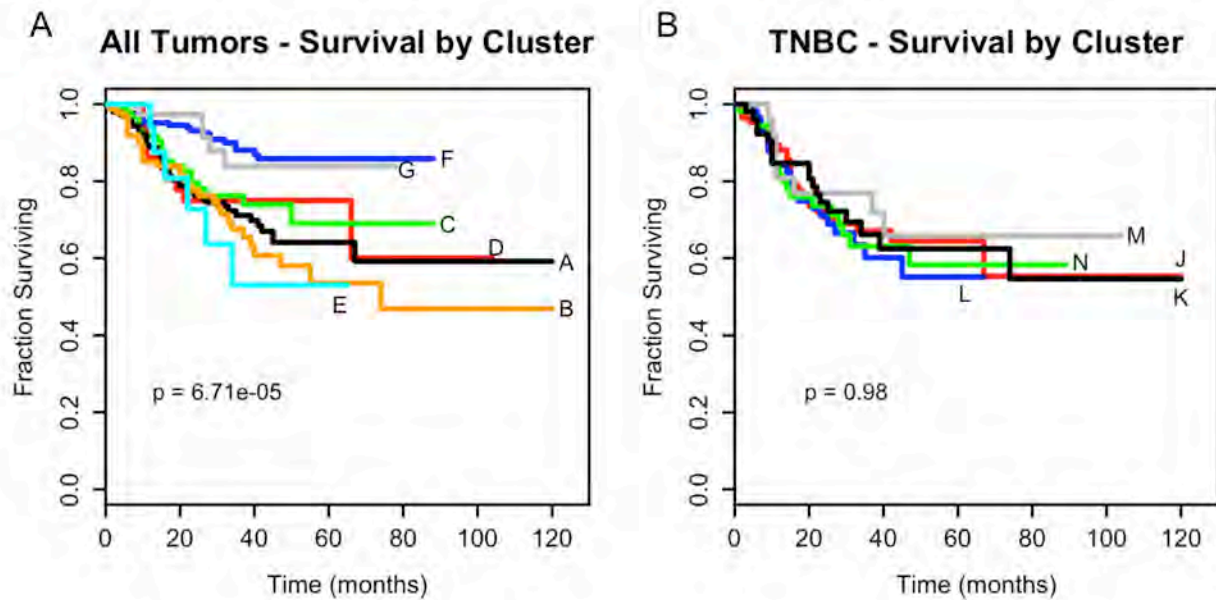

**Figure S11: Survival analysis by clusters. A,** Overall survival for the 7 VEGF-/Sema-based tumor clusters shows significant differences, particularly between clusters F and G with favorable prognoses and the remaining clusters. Cluster letters correspond to those in Figure 4. **B,** Overall survival for the 5 VEGF-/Sema-based TNBC clusters showed no significant differences in prognosis between clusters. Cluster numbers correspond to those in Figure 5.

**Figure S12.**

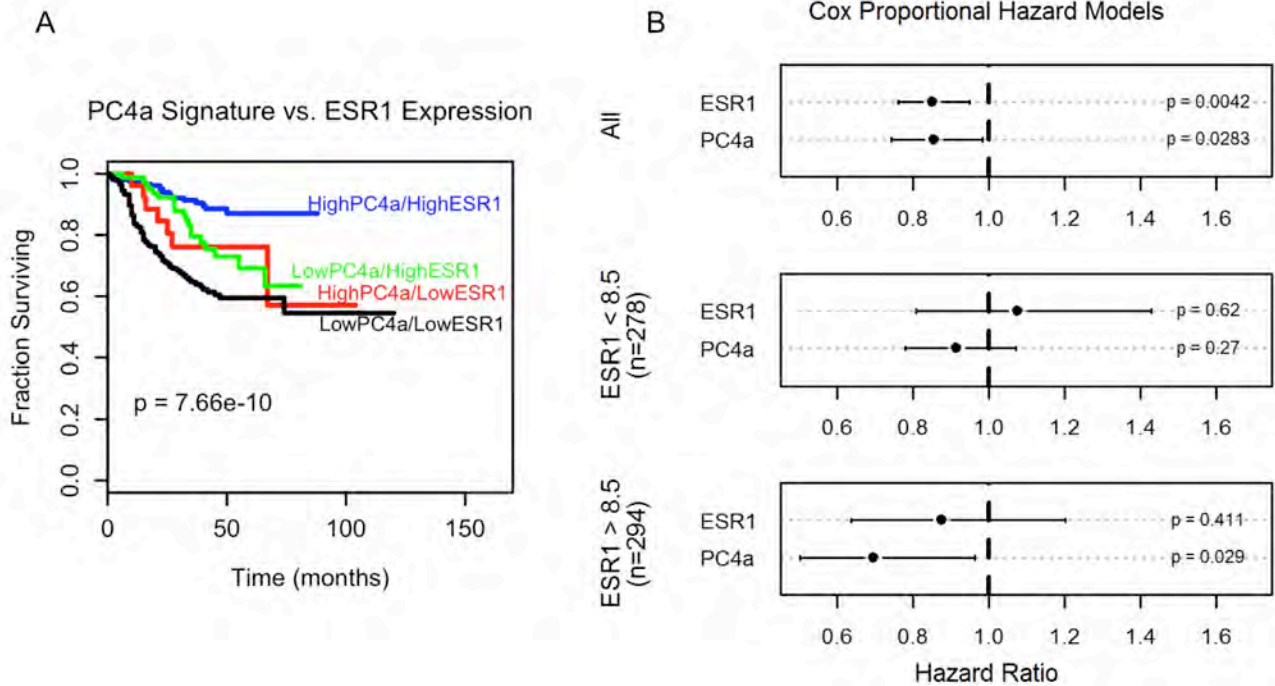

**Figure S12: Survival analysis based on PC4a and ESR1 expression. A**, Low PC4a scores and low ESR1 expression ("LowPC4a/LowESR1") were both associated with poorer prognoses. In high ESR1-expressing tumors ("HighESR1"), low PC4a scores resulted in poor prognosis as well, while high PC4a scores resulted in significantly better prognoses. **B**, Cox proportional hazard models reinforced the overall independence of ESR1 expression and PC4a score. Both factors were significantly associated with survival in a model of all tumors with survival data (top panel). In tumors with low ESR1 expression (middle panel), neither factor was significant. In a model of tumors with high ESR1 expression (bottom panel), PC4a score, but not ESR1 expression, had significant association with survival.

Figure S13.

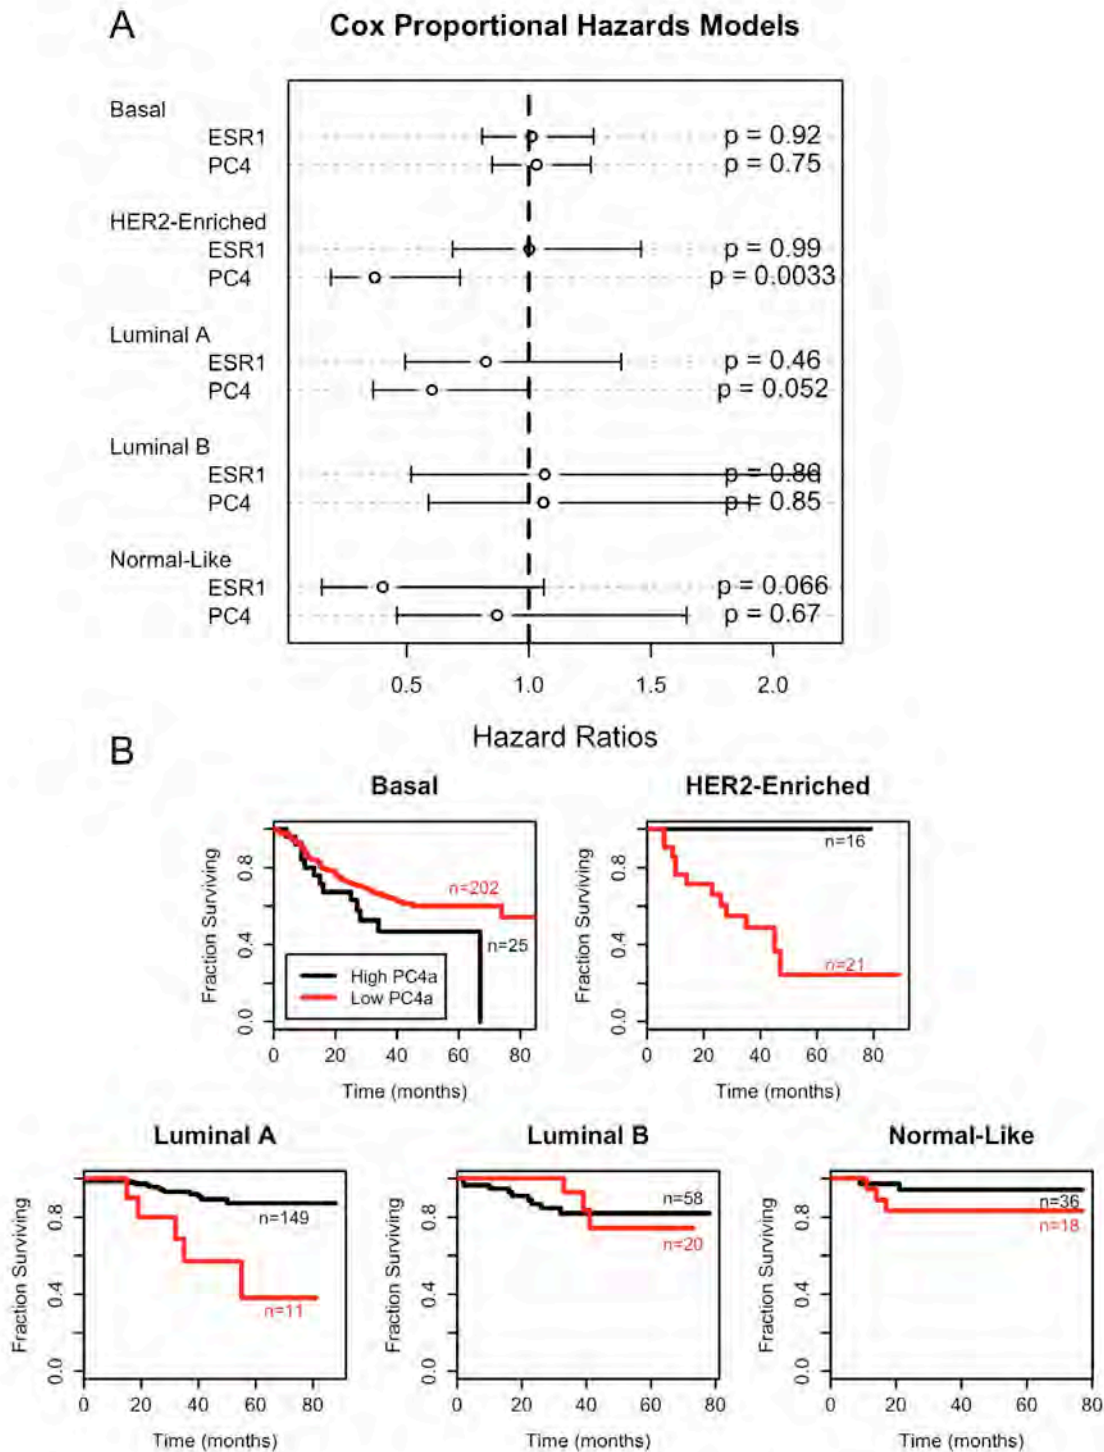

**Figure S13: Association between PC4a score in the five PAM50 subtypes. A**, Cox proportional hazard models for each PAM50 subtype demonstrated that PC4a score only was significantly associated with survival in the HER2-enriched subtype, while ESR1 expression was not significantly associated with survival in any of the subtypes. Hazard ratios indicate the effect of increasing PC4a score or ESR1 expression; thus, a lower hazard ratio indicates that high PC4a scores are associated with improved prognosis. PC4a scores and ESR1 expression were



included as continuous variables. **B**, PC4a scores below the median were typically associated with poorer prognoses except in the basal subtype. As the basal subtype is associated with low PC4a scores, very few samples in the basal subtype had high PC4a scores. This low number of samples explains the steep drop-off in the upper left plot.
